# Supplementary material for: Food insecurity is associated with mental health problems among Canadian youth
Source: HighWire-hosted journal article supplement (doi:10.1136/jech-2020-216149), 2021-02-12
Supplement: jech-2020-216149supp001_data_supplement.pdf [file jech-2020-216149supp001_data_supplement.pdf]

## Supplement

eFigure 1. Sample selection process

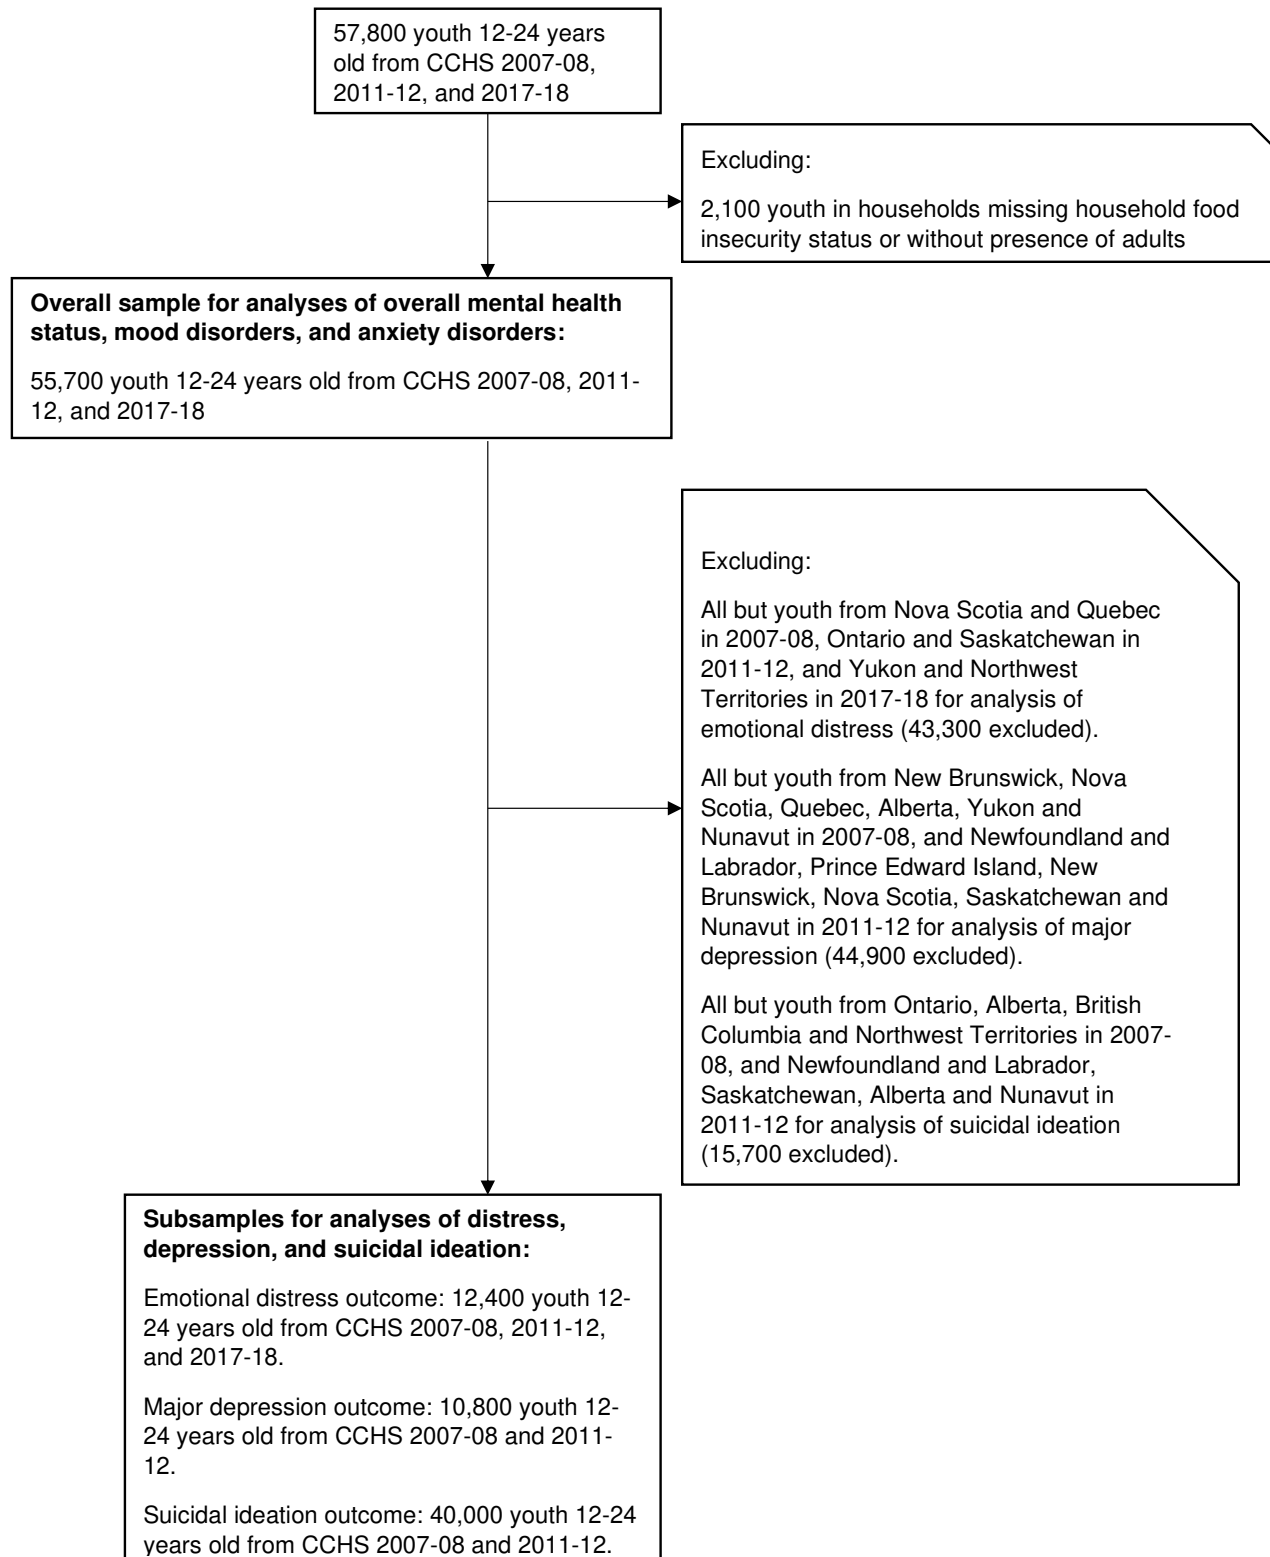

**eFigure 2.** Poorer mental health associated with food insecurity similarly across CCHS cycles 2007-08, 2011-12, and 2017-18 for Canadian youth 12-24 years old

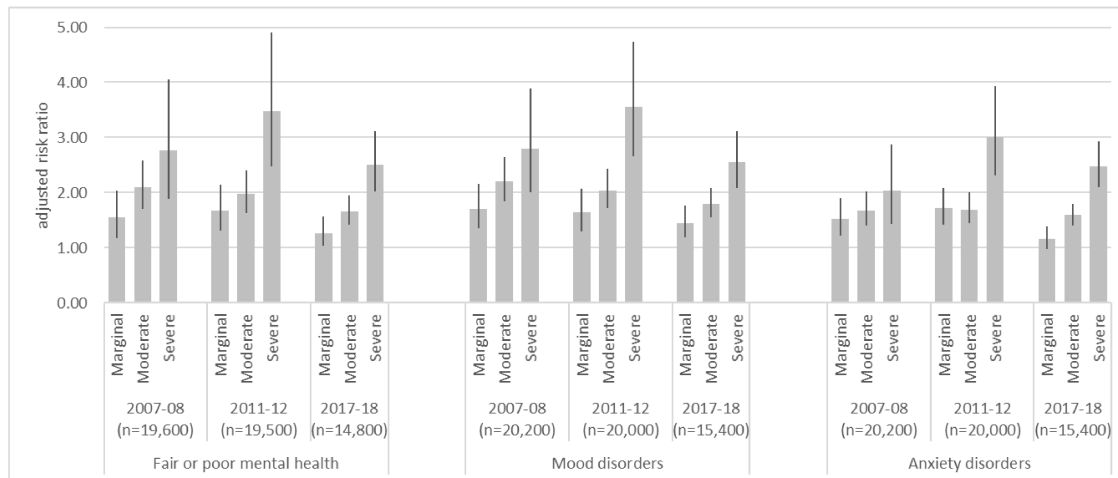

eTable 1. Jurisdictions that opted in for the distress, depression, and suicidal ideation measurements in the past CCHS cycles

|                          | NL | PE | NB | NS | QC | ON | SK | MB | AB | BC | YT | NW | NU |
|--------------------------|----|----|----|----|----|----|----|----|----|----|----|----|----|
| <b>Distress</b>          |    |    |    |    |    |    |    |    |    |    |    |    |    |
| 2007-08                  |    |    |    | X  | X  |    |    |    |    |    |    |    |    |
| 2011-12                  |    |    |    |    |    | X  | X  |    |    |    |    |    |    |
| 2017-18                  |    |    |    |    |    |    |    |    |    |    | X  | X  |    |
| <b>Depression</b>        |    |    |    |    |    |    |    |    |    |    |    |    |    |
| 2007-08                  |    |    | X  | X  | X  |    |    |    | X  |    | X  |    | X  |
| 2011-12                  | X  | X  | X  | X  |    |    | X  |    |    |    |    |    | X  |
| 2017-18                  |    |    |    |    |    |    |    |    |    |    |    |    |    |
| <b>Suicidal ideation</b> |    |    |    |    |    |    |    |    |    |    |    |    |    |
| 2007-08                  |    |    |    |    |    | X  |    |    | X  | X  |    | X  |    |
| 2011-12                  | X  |    |    |    |    |    | X  |    | X  |    |    |    | X  |
| 2017-18                  |    |    |    |    |    |    |    |    |    |    |    |    |    |

Note: "X" denotes opt-in of the measurement by the jurisdiction in a CCHS cycle. Kessler 10-item, 40 points max: Well if 0-9, Mild if 10-14, Moderate 15-24, Severe 25-40. "At least mild distress" if score surpasses 9. No data in 2015-16. Kessler "6-item K-6 distress" if score surpasses 5 (out of 24 total). Measured by 8-item WHO CIDI-SF depression scale, major depressive episodes if scale>4; major depression if scale>2; any depressive symptom if scale>0. PHQ-9 0-27-point scale available in 2017-18, but only applied in PE and NW (N=394). "Suicidal ideation" if had thought of committing suicide in the past 12 months. No data existed in depression or suicidal ideation in 2017-18. NL=Newfoundland and Labrador; PE=Prince Edward Island; NB=New Brunswick; NS=Nova Scotia; QC=Quebec; ON=Ontario; SK=Saskatchewan; MB=Manitoba; AB=Alberta; BC=British Columbia; YT=Yukon; NW=Northwest Territories; NU=Nunavut.

eTable 2. Operational details of outcome variables

| Variable             | Type        | Coding                                                                                                                                                                                                                                                                                                                                                                                                                                                                                                                                                                                                                                                                                                                                                                                                                                                                                                    |
|----------------------|-------------|-----------------------------------------------------------------------------------------------------------------------------------------------------------------------------------------------------------------------------------------------------------------------------------------------------------------------------------------------------------------------------------------------------------------------------------------------------------------------------------------------------------------------------------------------------------------------------------------------------------------------------------------------------------------------------------------------------------------------------------------------------------------------------------------------------------------------------------------------------------------------------------------------------------|
| Mental health status | Dichotomous | Coded 1 if self-rated fair or poor mental health (versus excellent/very good/good).                                                                                                                                                                                                                                                                                                                                                                                                                                                                                                                                                                                                                                                                                                                                                                                                                       |
| Mood disorders       | Dichotomous | Coded 1 if self-reported clinically diagnosed mood disorder such as depression, bipolar disorder, mania, or dysthymia.                                                                                                                                                                                                                                                                                                                                                                                                                                                                                                                                                                                                                                                                                                                                                                                    |
| Anxiety disorders    | Dichotomous | Coded 1 if self-reported clinically diagnosed anxiety disorder such as phobia, obsessive-compulsive disorder, or panic disorder                                                                                                                                                                                                                                                                                                                                                                                                                                                                                                                                                                                                                                                                                                                                                                           |
| Emotional distress   | Dichotomous | Measured by 10-item Kessler Psychological Distress Scale. Respondents score 0-4 on each of the ten questions depending on the frequency of distressful feelings in the past 30 days ranging from none (0) to all of the time (4). The total score ranges from 0 to 40. A score of 10 or above is coded 1, indicating possible mental disorder whether it is mild, moderate, or severe. We also experimented with taking log of the total score (to correct for right skewness) and use the continuous variable in an OLS model.                                                                                                                                                                                                                                                                                                                                                                           |
| Major depression     | Dichotomous | Measured by WHO's CIDI-SF for major depression. Respondents are screened for whether they have either felt depressive or lost interest in most things that usually give them pleasure most of the day almost every day for 2 weeks or more in a row in the past 12 months. Affirmative answer to either screener will classify the respondent as "having any depressive symptom". Follow-up questions ask about "feeling tired", "weight gain or loss", "trouble falling asleep", "trouble concentrating", "feeling down on yourself", and "thoughts about death". Three affirmative answers with at least one on screeners qualify the person as a "probable case of depression". Five affirmative answers with at least one on screeners qualify the person as having "major depressive episodes". We also used the number of affirmative answers as a count variable and fitted it in a Poisson model. |
| Suicidal ideation    | Dichotomous | Coded 1 if ever seriously considered committing suicide or taking your own life in the past 12 months.                                                                                                                                                                                                                                                                                                                                                                                                                                                                                                                                                                                                                                                                                                                                                                                                    |

eTable 3. Food insecurity level, based on CCHS 18-item questionnaire

| Status                   | Measurement                                                                                          | Interpretation                                                                                                    |
|--------------------------|------------------------------------------------------------------------------------------------------|-------------------------------------------------------------------------------------------------------------------|
| Food-secure              | Affirmed no item on either the 10-item adult food security scale or 8-item child food security scale | No report of income-related problems of food access.                                                              |
| Marginally food-insecure | Affirmed no more than 1 item on either scale                                                         | Some indication of worry or an income-related barrier to adequate, secure food access.                            |
| Moderately food-insecure | Affirmed 2 to 5 items on the adult scale or 2 to 4 items on the child scale                          | Compromise in quality and/or quantity of food consumed by adults and/or children due to a lack of money for food. |
| Severely food-insecure   | Affirmed more than 5 items on the adult scale or more than 4 items on the child scale                | Disrupted eating patterns and reduced food intake among adults and/or children                                    |

eTable 4. Poorer mental health outcomes among Canadian youth 12-24 years old independently associated with household food insecurity

|                                                     | Fair or poor mental health | Mood disorders            | Anxiety disorders         | Emotional distress        | Major depression          | Suicidal ideation         |
|-----------------------------------------------------|----------------------------|---------------------------|---------------------------|---------------------------|---------------------------|---------------------------|
| Food-secure (reference)                             | 1.00<br>(1.00 - 1.00)      | 1.00<br>(1.00 - 1.00)     | 1.00<br>(1.00 - 1.00)     | 1.00<br>(1.00 - 1.00)     | 1.00<br>(1.00 - 1.00)     | 1.00<br>(1.00 - 1.00)     |
| Marginally food-insecure                            | 1.46****<br>(1.28 - 1.68)  | 1.57****<br>(1.38 - 1.78) | 1.41****<br>(1.26 - 1.58) | 1.61****<br>(1.40 - 1.84) | 1.49**<br>(1.14 - 1.95)   | 1.77**<br>(1.21 - 2.60)   |
| Moderately food-insecure                            | 1.89****<br>(1.70 - 2.09)  | 2.00****<br>(1.81 - 2.19) | 1.65****<br>(1.51 - 1.80) | 1.64****<br>(1.46 - 1.84) | 1.96****<br>(1.59 - 2.40) | 2.44****<br>(1.83 - 3.26) |
| Severely food-insecure                              | 2.82****<br>(2.39 - 3.32)  | 2.89****<br>(2.49 - 3.35) | 2.58****<br>(2.27 - 2.94) | 2.26****<br>(1.83 - 2.78) | 2.56****<br>(1.73 - 3.79) | 6.49****<br>(4.34 - 9.71) |
| Male (reference)                                    | 1.00<br>(1.00 - 1.00)      | 1.00<br>(1.00 - 1.00)     | 1.00<br>(1.00 - 1.00)     | 1.00<br>(1.00 - 1.00)     | 1.00<br>(1.00 - 1.00)     | 1.00<br>(1.00 - 1.00)     |
| Female                                              | 1.37****<br>(1.28 - 1.48)  | 1.71****<br>(1.59 - 1.83) | 1.66****<br>(1.56 - 1.76) | 1.52****<br>(1.41 - 1.63) | 2.16****<br>(1.87 - 2.51) | 1.36**<br>(1.12 - 1.65)   |
| Age (years)                                         | 1.08****<br>(1.07 - 1.09)  | 1.12****<br>(1.11 - 1.13) | 1.06****<br>(1.05 - 1.07) | 1.03****<br>(1.02 - 1.04) | 1.09****<br>(1.07 - 1.11) | 1.12****<br>(1.09 - 1.14) |
| White (reference)                                   | 1.00<br>(1.00 - 1.00)      | 1.00<br>(1.00 - 1.00)     | 1.00<br>(1.00 - 1.00)     | 1.00<br>(1.00 - 1.00)     | 1.00<br>(1.00 - 1.00)     | 1.00<br>(1.00 - 1.00)     |
| Black                                               | 0.78+<br>(0.60 - 1.02)     | 0.42****<br>(0.30 - 0.59) | 0.36****<br>(0.26 - 0.49) | 0.96<br>(0.76 - 1.21)     | 1.00<br>(0.55 - 1.84)     | 0.83<br>(0.41 - 1.69)     |
| Indigenous                                          | 1.13+<br>(1.00 - 1.27)     | 1.19**<br>(1.07 - 1.33)   | 1.26****<br>(1.15 - 1.38) | 1.20**<br>(1.05 - 1.37)   | 1.22<br>(0.95 - 1.56)     | 1.32+<br>(0.98 - 1.77)    |
| Other ethnicities                                   | 0.87*<br>(0.78 - 0.98)     | 0.52****<br>(0.46 - 0.59) | 0.49****<br>(0.44 - 0.55) | 0.87*<br>(0.76 - 0.99)    | 1.04<br>(0.76 - 1.43)     | 0.80<br>(0.56 - 1.13)     |
| Missing                                             | 1.09<br>(0.82 - 1.45)      | 1.10<br>(0.84 - 1.44)     | 0.98<br>(0.78 - 1.22)     | 0.88<br>(0.64 - 1.22)     | 0.56<br>(0.24 - 1.31)     | 1.45<br>(0.66 - 3.20)     |
| Household income (\$10,000 in 2018 Canadian dollar) | 0.99***<br>(0.98 - 1.00)   | 0.99***<br>(0.98 - 0.99)  | 0.99*<br>(0.99 - 1.00)    | 0.99*<br>(0.98 - 1.00)    | 1.00<br>(0.99 - 1.01)     | 1.00<br>(0.98 - 1.02)     |
| Income imputed by Statistics Canada                 | 1.09*<br>(1.00 - 1.19)     | 1.08+<br>(1.00 - 1.17)    | 0.93*<br>(0.86 - 0.99)    | 1.07+<br>(0.99 - 1.15)    | 1.00<br>(0.86 - 1.15)     | 1.16<br>(0.95 - 1.43)     |
| High school incomplete                              | 1.03<br>(0.86 - 1.24)      | 1.10<br>(0.94 - 1.27)     | 1.08<br>(0.94 - 1.24)     | 1.23*<br>(1.01 - 1.48)    | 1.29<br>(0.91 - 1.83)     | 0.73<br>(0.44 - 1.21)     |
| High school graduate (reference)                    | 1.00<br>(1.00 - 1.00)      | 1.00<br>(1.00 - 1.00)     | 1.00<br>(1.00 - 1.00)     | 1.00<br>(1.00 - 1.00)     | 1.00<br>(1.00 - 1.00)     | 1.00<br>(1.00 - 1.00)     |
| Some college                                        | 1.33**<br>(1.11 - 1.60)    | 1.11<br>(0.94 - 1.31)     | 1.14+<br>(0.98 - 1.33)    | 1.23*<br>(1.03 - 1.47)    | 1.14<br>(0.81 - 1.60)     | 1.17<br>(0.79 - 1.72)     |
| Bachelor's degree                                   | 1.00<br>(0.90 - 1.11)      | 0.89*<br>(0.81 - 0.97)    | 0.98<br>(0.90 - 1.06)     | 1.06<br>(0.93 - 1.20)     | 1.27*<br>(1.00 - 1.60)    | 0.83<br>(0.62 - 1.11)     |
| Education status missing                            | 1.25**                     | 1.04                      | 1.14*                     | 1.19*                     | 1.63***                   | 1.18                      |

|                                   |               |               |               |               |               |               |
|-----------------------------------|---------------|---------------|---------------|---------------|---------------|---------------|
|                                   | (1.08 - 1.45) | (0.91 - 1.19) | (1.01 - 1.28) | (1.03 - 1.39) | (1.24 - 2.13) | (0.84 - 1.66) |
| Renter (reference)                | 1.00          | 1.00          | 1.00          | 1.00          | 1.00          | 1.00          |
|                                   | (1.00 - 1.00) | (1.00 - 1.00) | (1.00 - 1.00) | (1.00 - 1.00) | (1.00 - 1.00) | (1.00 - 1.00) |
| Homeowner                         | 0.99          | 0.96          | 0.97          | 0.96          | 0.96          | 1.23          |
|                                   | (0.90 - 1.08) | (0.88 - 1.05) | (0.90 - 1.04) | (0.87 - 1.05) | (0.80 - 1.15) | (0.95 - 1.58) |
| Missing                           | 0.65+         | 0.73          | 0.73          | 0.98          | 1.58          | 0.58          |
|                                   | (0.39 - 1.07) | (0.45 - 1.19) | (0.50 - 1.07) | (0.58 - 1.65) | (0.76 - 3.29) | (0.08 - 4.30) |
| Married with children (reference) | 1.00          | 1.00          | 1.00          | 1.00          | 1.00          | 1.00          |
|                                   | (1.00 - 1.00) | (1.00 - 1.00) | (1.00 - 1.00) | (1.00 - 1.00) | (1.00 - 1.00) | (1.00 - 1.00) |
| Married without children          | 1.01          | 1.06          | 1.12+         | 0.89          | 0.74+         | 0.87          |
|                                   | (0.86 - 1.19) | (0.92 - 1.22) | (0.99 - 1.27) | (0.74 - 1.06) | (0.54 - 1.02) | (0.55 - 1.37) |
| Lone parents                      | 1.31****      | 1.39****      | 1.32****      | 1.16**        | 1.42***       | 1.38*         |
|                                   | (1.19 - 1.44) | (1.27 - 1.52) | (1.22 - 1.42) | (1.06 - 1.28) | (1.19 - 1.70) | (1.07 - 1.78) |
| Individuals and other types       | 1.24***       | 1.21***       | 1.13*         | 1.04          | 1.28*         | 1.44*         |
|                                   | (1.10 - 1.39) | (1.08 - 1.36) | (1.02 - 1.26) | (0.91 - 1.20) | (1.02 - 1.60) | (1.06 - 1.96) |
| Missing                           | 1.29          | 1.50*         | 1.36+         | 1.33+         | 0.74          | 0.77          |
|                                   | (0.82 - 2.03) | (1.00 - 2.25) | (0.96 - 1.92) | (0.95 - 1.86) | (0.25 - 2.21) | (0.19 - 3.15) |
| Ontario (reference)               | 1.00          | 1.00          | 1.00          | 1.00          |               | 1.00          |
|                                   | (1.00 - 1.00) | (1.00 - 1.00) | (1.00 - 1.00) | (1.00 - 1.00) |               | (1.00 - 1.00) |
| British Columbia                  | 1.02          | 0.91+         | 0.91*         |               |               | 0.73+         |
|                                   | (0.91 - 1.14) | (0.81 - 1.02) | (0.82 - 1.00) |               |               | (0.53 - 1.01) |
| Quebec                            | 0.57****      | 0.40****      | 0.68****      | 1.33****      | 1.00          | 0.00****      |
|                                   | (0.51 - 0.65) | (0.36 - 0.46) | (0.62 - 0.74) | (1.22 - 1.45) | (1.00 - 1.00) | (0.00 - 0.00) |
| Alberta                           | 0.96          | 1.01          | 0.91*         |               | 2.16****      | 2.01****      |
|                                   | (0.85 - 1.08) | (0.90 - 1.12) | (0.82 - 1.00) |               | (1.76 - 2.65) | (1.58 - 2.54) |
| Saskatchewan                      | 0.85*         | 0.81**        | 0.73****      | 1.13+         | 1.07          | 1.10          |
|                                   | (0.71 - 1.00) | (0.70 - 0.94) | (0.63 - 0.84) | (0.99 - 1.29) | (0.74 - 1.53) | (0.77 - 1.55) |
| Manitoba                          | 0.96          | 0.77***       | 0.87*         |               |               | 0.00****      |
|                                   | (0.83 - 1.12) | (0.66 - 0.89) | (0.77 - 0.99) |               |               | (0.00 - 0.00) |
| Newfoundland and Labrador         | 0.95          | 0.83+         | 0.88          |               | 1.71**        | 0.76          |
|                                   | (0.77 - 1.17) | (0.69 - 1.01) | (0.75 - 1.04) |               | (1.18 - 2.48) | (0.43 - 1.35) |
| Maritime provinces                | 0.97          | 0.84**        | 1.01          | 1.10          | 1.63****      | 0.00****      |
|                                   | (0.85 - 1.10) | (0.74 - 0.94) | (0.91 - 1.11) | (0.94 - 1.29) | (1.29 - 2.06) | (0.00 - 0.00) |
| Territories                       | 0.82*         | 0.49****      | 0.46****      | 1.55****      | 0.95          | 0.67          |
|                                   | (0.67 - 1.00) | (0.39 - 0.61) | (0.37 - 0.56) | (1.28 - 1.87) | (0.61 - 1.47) | (0.40 - 1.10) |
| CCHS 2007-2008                    | 0.82****      | 0.86***       | 0.76****      | 1.00          | 0.84          | 2.25****      |
|                                   | (0.75 - 0.90) | (0.79 - 0.94) | (0.71 - 0.83) | (1.00 - 1.00) | (0.67 - 1.04) | (1.82 - 2.79) |
| CCHS 2011-2012 (reference)        | 1.00          | 1.00          | 1.00          | 1.00          | 1.00          | 1.00          |
|                                   | (1.00 - 1.00) | (1.00 - 1.00) | (1.00 - 1.00) | (1.00 - 1.00) | (1.00 - 1.00) | (1.00 - 1.00) |
| CCHS 2017-2018                    | 2.06****      | 1.72****      | 1.84****      | 1.00          |               |               |
|                                   | (1.88 - 2.25) | (1.58 - 1.88) | (1.71 - 1.97) | (1.00 - 1.00) |               |               |
| <i>N</i>                          | 53,900        | 55,600        | 55,600        | 12,400        | 10,800        | 40,000        |

Notes: Adjusted relative risk estimated with robust standard errors. 95% confidence interval shown in parentheses. \*\*\*\* p<0.0001, \*\*\* p<0.001, \*\* p<0.01, \* p<0.05, + p<0.1. All models adjusted for food insecurity status, sex, age, race-ethnicity, income, income imputation, household highest education, homeownership, household type, jurisdiction, and CCHS cycle.

eTable 5. Sensitivity tests on exclusion of outliers and modifications to outcomes

|                           | Dropped Nunavut from sample |                |                   | Changed thresholds of outcomes |                              |                        | Logged outcomes      |                              |
|---------------------------|-----------------------------|----------------|-------------------|--------------------------------|------------------------------|------------------------|----------------------|------------------------------|
|                           | Fair or poor mental health  | Mood disorders | Anxiety disorders | Moderate+ distress (15-40)     | Any depressive symptom (1-8) | Major depression (3-8) | Log (distress score) | Log (depression probability) |
| Food security (reference) | 1.00                        | 1.00           | 1.00              | 1.00                           | 1.00                         | 1.00                   | 0.00                 | 0.00                         |
| Marginal FI               | 1.43                        | 1.57           | 1.41              | 2.05                           | 1.50                         | 1.47                   | 0.45                 | 0.44                         |
| LB                        | 1.25                        | 1.39           | 1.26              | 1.63                           | 1.20                         | 1.17                   | 0.34                 | 0.17                         |
| UB                        | 1.65                        | 1.79           | 1.57              | 2.57                           | 1.86                         | 1.85                   | 0.56                 | 0.70                         |
| Moderate FI               | 1.90                        | 2.00           | 1.68              | 2.10                           | 1.81                         | 1.79                   | 0.39                 | 0.72                         |
| LB                        | 1.71                        | 1.82           | 1.54              | 1.74                           | 1.52                         | 1.50                   | 0.29                 | 0.47                         |
| UB                        | 2.11                        | 2.21           | 1.83              | 2.54                           | 2.14                         | 2.14                   | 0.48                 | 0.96                         |
| Severe FI                 | 2.92                        | 3.03           | 2.71              | 3.32                           | 2.33                         | 2.29                   | 0.80                 | 1.12                         |
| LB                        | 2.48                        | 2.62           | 2.38              | 2.36                           | 1.67                         | 1.62                   | 0.58                 | 0.50                         |
| UB                        | 3.45                        | 3.51           | 3.08              | 4.67                           | 3.24                         | 3.25                   | 1.03                 | 1.74                         |
| <i>N</i>                  | 53400                       | 55000          | 55000             | 12400                          | 10800                        | 10800                  | 11000                | 10800                        |

Notes: FI = food insecurity. LB = lower bound of 95% confidence interval. UB = upper bound of 95% confidence interval. Linear models were applied on the two logged outcomes while Poisson models were applied on the other six outcomes. All models adjusted for food insecurity status, sex, age, race-ethnicity, income, income imputation, household highest education, homeownership, household type, jurisdiction, and CCHS cycle.



eTable 6. Conditional predicted probability of mental health problems by food insecurity status based on adjusted Poisson models: overall sample and age, gender, and CCHS cycle subsamples

|                                            | Food insecurity status |                     |                     |                   |
|--------------------------------------------|------------------------|---------------------|---------------------|-------------------|
|                                            | Secure                 | Marginally insecure | Moderately insecure | Severely insecure |
| <b>Panel A. Fair or poor mental health</b> |                        |                     |                     |                   |
| Overall (n=53,900)                         | 0.046                  | 0.068               | 0.087               | 0.130             |
| 12-17 years old (n=27,700)                 | 0.036                  | 0.045               | 0.052               | 0.062             |
| 18-24 years old (n=26,200)                 | 0.056                  | 0.092               | 0.128               | 0.211             |
| Male (n=26,800)                            | 0.038                  | 0.066               | 0.070               | 0.118             |
| Female (n=27,200)                          | 0.054                  | 0.071               | 0.103               | 0.145             |
| CCHS 2007-08 (n=19,600)                    | 0.032                  | 0.050               | 0.068               | 0.089             |
| CCHS 2011-12 (n=19,500)                    | 0.038                  | 0.064               | 0.076               | 0.134             |
| CCHS 2017-18 (n=14,800)                    | 0.075                  | 0.095               | 0.124               | 0.188             |
| <b>Panel B. Mood disorders</b>             |                        |                     |                     |                   |
| Overall (n=55,600)                         | 0.048                  | 0.076               | 0.096               | 0.139             |
| 12-17 years old (n=28,900)                 | 0.031                  | 0.046               | 0.052               | 0.076             |
| 18-24 years old (n=26,700)                 | 0.067                  | 0.107               | 0.145               | 0.206             |
| Male (n=27,800)                            | 0.033                  | 0.061               | 0.072               | 0.110             |
| Female (n=27,800)                          | 0.063                  | 0.091               | 0.120               | 0.170             |
| CCHS 2007-08 (n=20,200)                    | 0.038                  | 0.065               | 0.084               | 0.107             |
| CCHS 2011-12 (n=20,000)                    | 0.043                  | 0.070               | 0.087               | 0.152             |
| CCHS 2017-18 (n=15,400)                    | 0.068                  | 0.099               | 0.122               | 0.173             |
| <b>Panel C. Anxiety disorders</b>          |                        |                     |                     |                   |
| Overall (n=55,600)                         | 0.069                  | 0.098               | 0.114               | 0.178             |
| 12-17 years old (n=28,900)                 | 0.056                  | 0.072               | 0.081               | 0.132             |
| 18-24 years old (n=26,700)                 | 0.083                  | 0.125               | 0.150               | 0.228             |
| Male (n=27,800)                            | 0.051                  | 0.071               | 0.082               | 0.138             |
| Female (n=27,800)                          | 0.087                  | 0.124               | 0.145               | 0.219             |
| CCHS 2007-08 (n=20,200)                    | 0.049                  | 0.074               | 0.082               | 0.099             |
| CCHS 2011-12 (n=20,000)                    | 0.060                  | 0.103               | 0.101               | 0.180             |
| CCHS 2017-18 (n=15,400)                    | 0.108                  | 0.126               | 0.172               | 0.268             |
| <b>Panel D. Optional outcomes, overall</b> |                        |                     |                     |                   |
| Emotional distress (n=12,400)              | 0.173                  | 0.277               | 0.283               | 0.390             |
| Major depression (n=10,800)                | 0.062                  | 0.092               | 0.121               | 0.158             |
| Suicidal ideation (n=40,000)               | 0.008                  | 0.015               | 0.021               | 0.054             |

Note: Regressions and probabilities were estimated only on the overall samples for the optional outcomes in Panel D. Probabilities of food-insecure youth were higher than those of food-secure youth at  $p < 0.05$  for all outcomes except for the "fair or poor mental health" and "anxiety disorders" outcomes among marginally food-insecure youth from CCHS 2017-18.
